# Supplementary material
Source: PubMed Central journal article supplement (PMC3766726)

## Elongation on 6(FK) mRNA

5'-Biotin-UTR-AUG(UUC AAA)<sub>1</sub>UAAUUUUUUUUUUUUUU-3'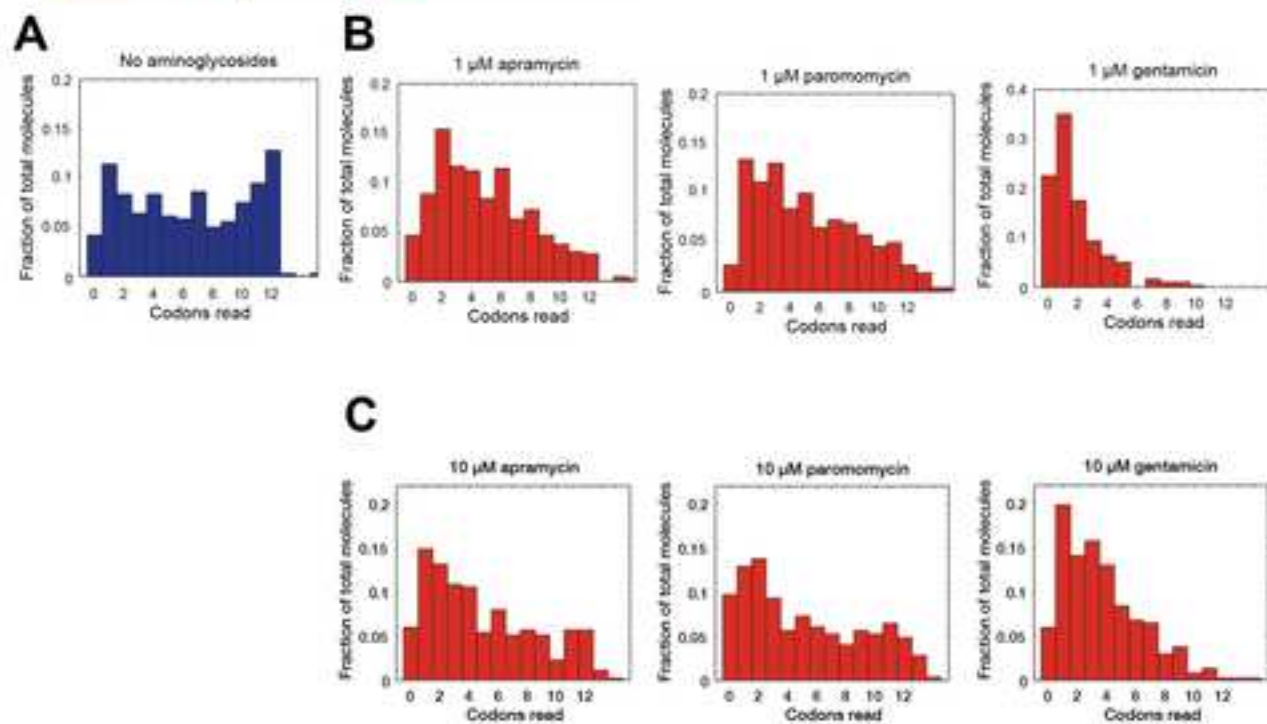

## Elongation on 3F mRNA

5'-Biotin-UTR-AUG(UUU)<sub>1</sub>UAAUUUUUUUUUUUUUU-3'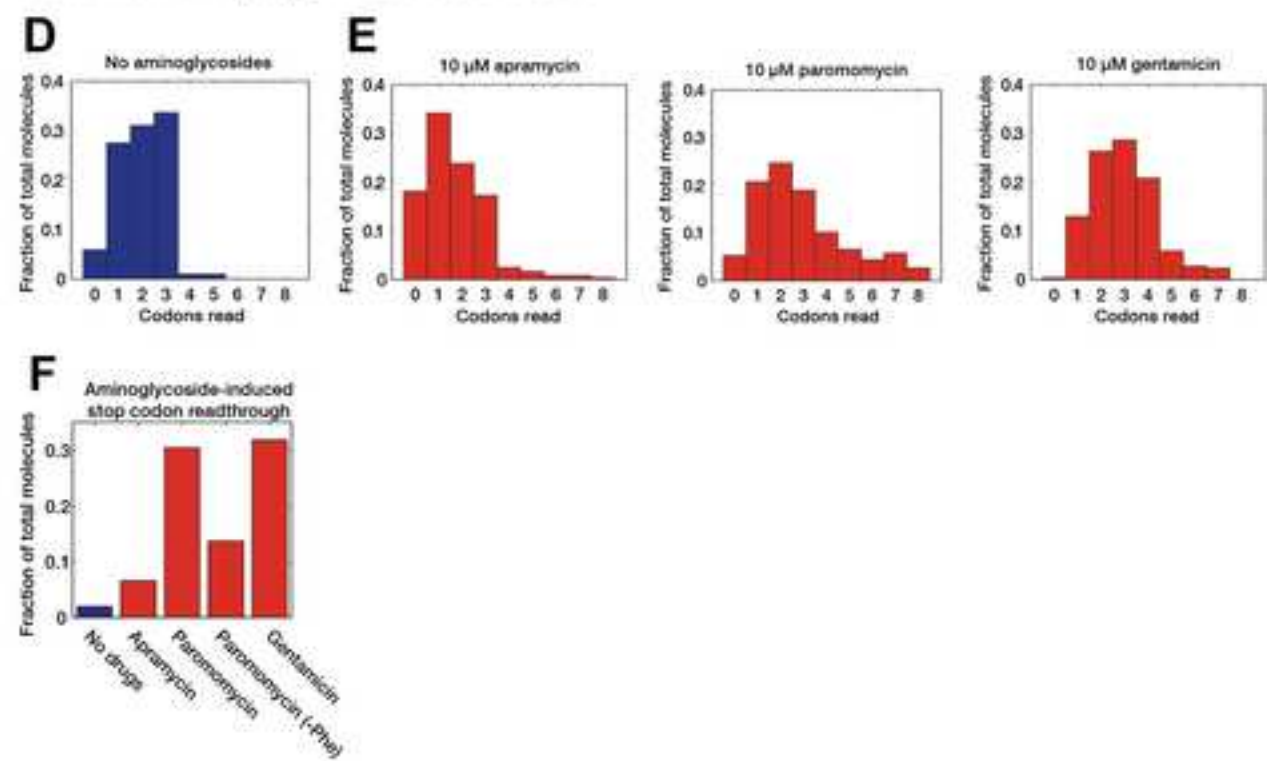

Figure S2

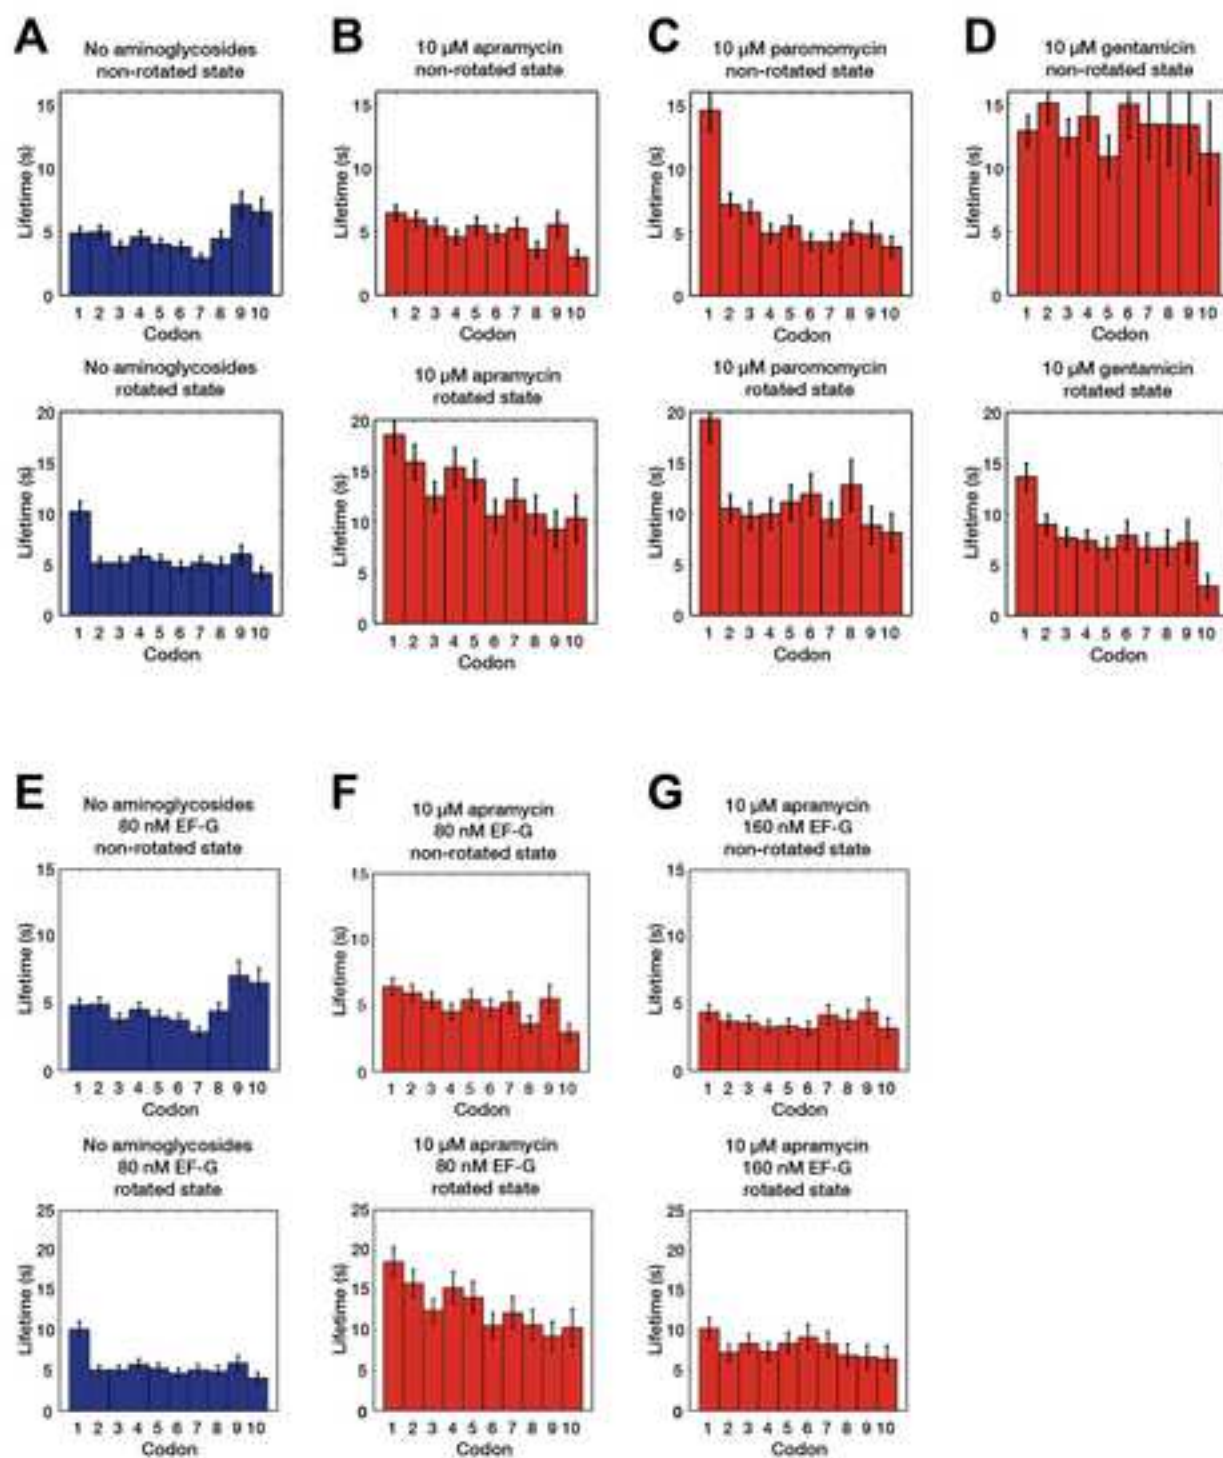

A

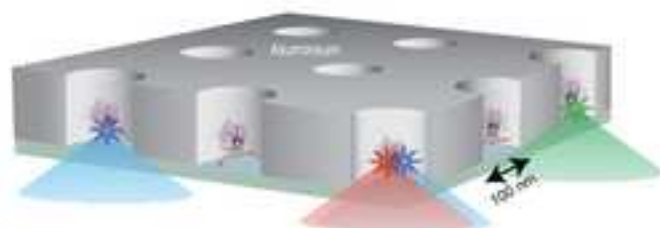

B

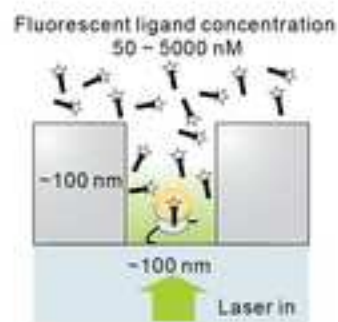

Elongation on 6(FK) mRNA  
 5'-Biotin-UTR-AUG(UUC AAA)<sub>4</sub>UAAUUUUUUUUUUUUUU-3'

C

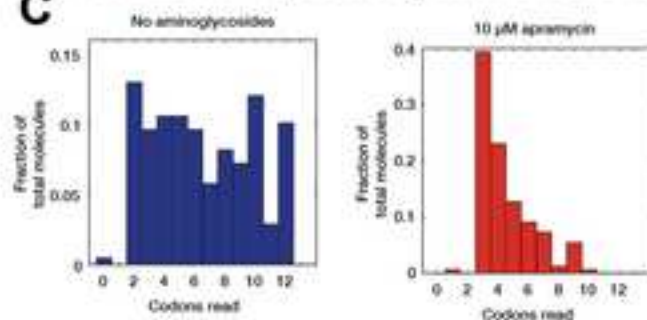

D

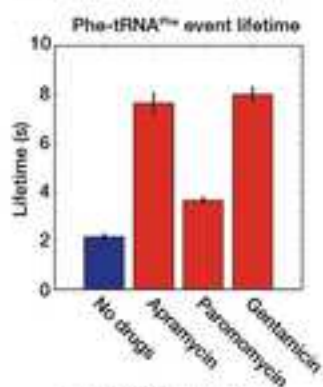

E

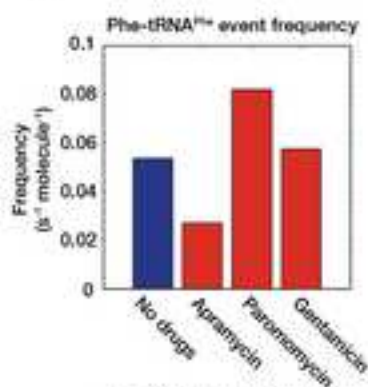

F

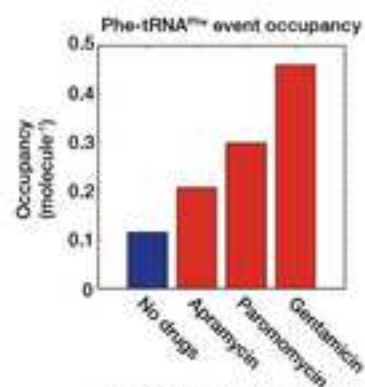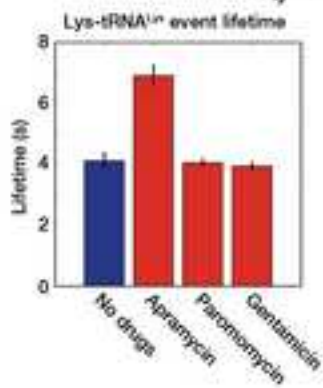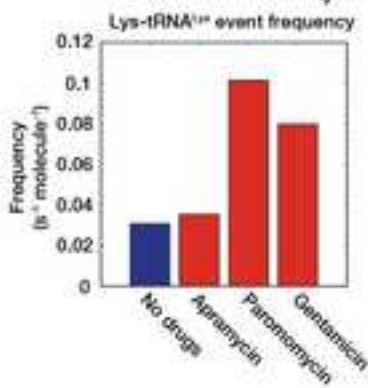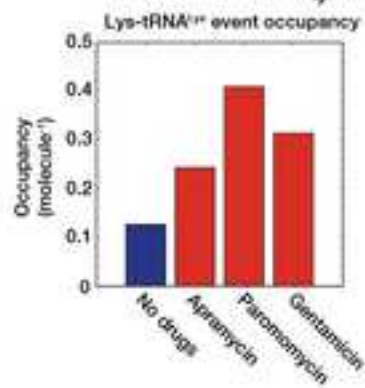



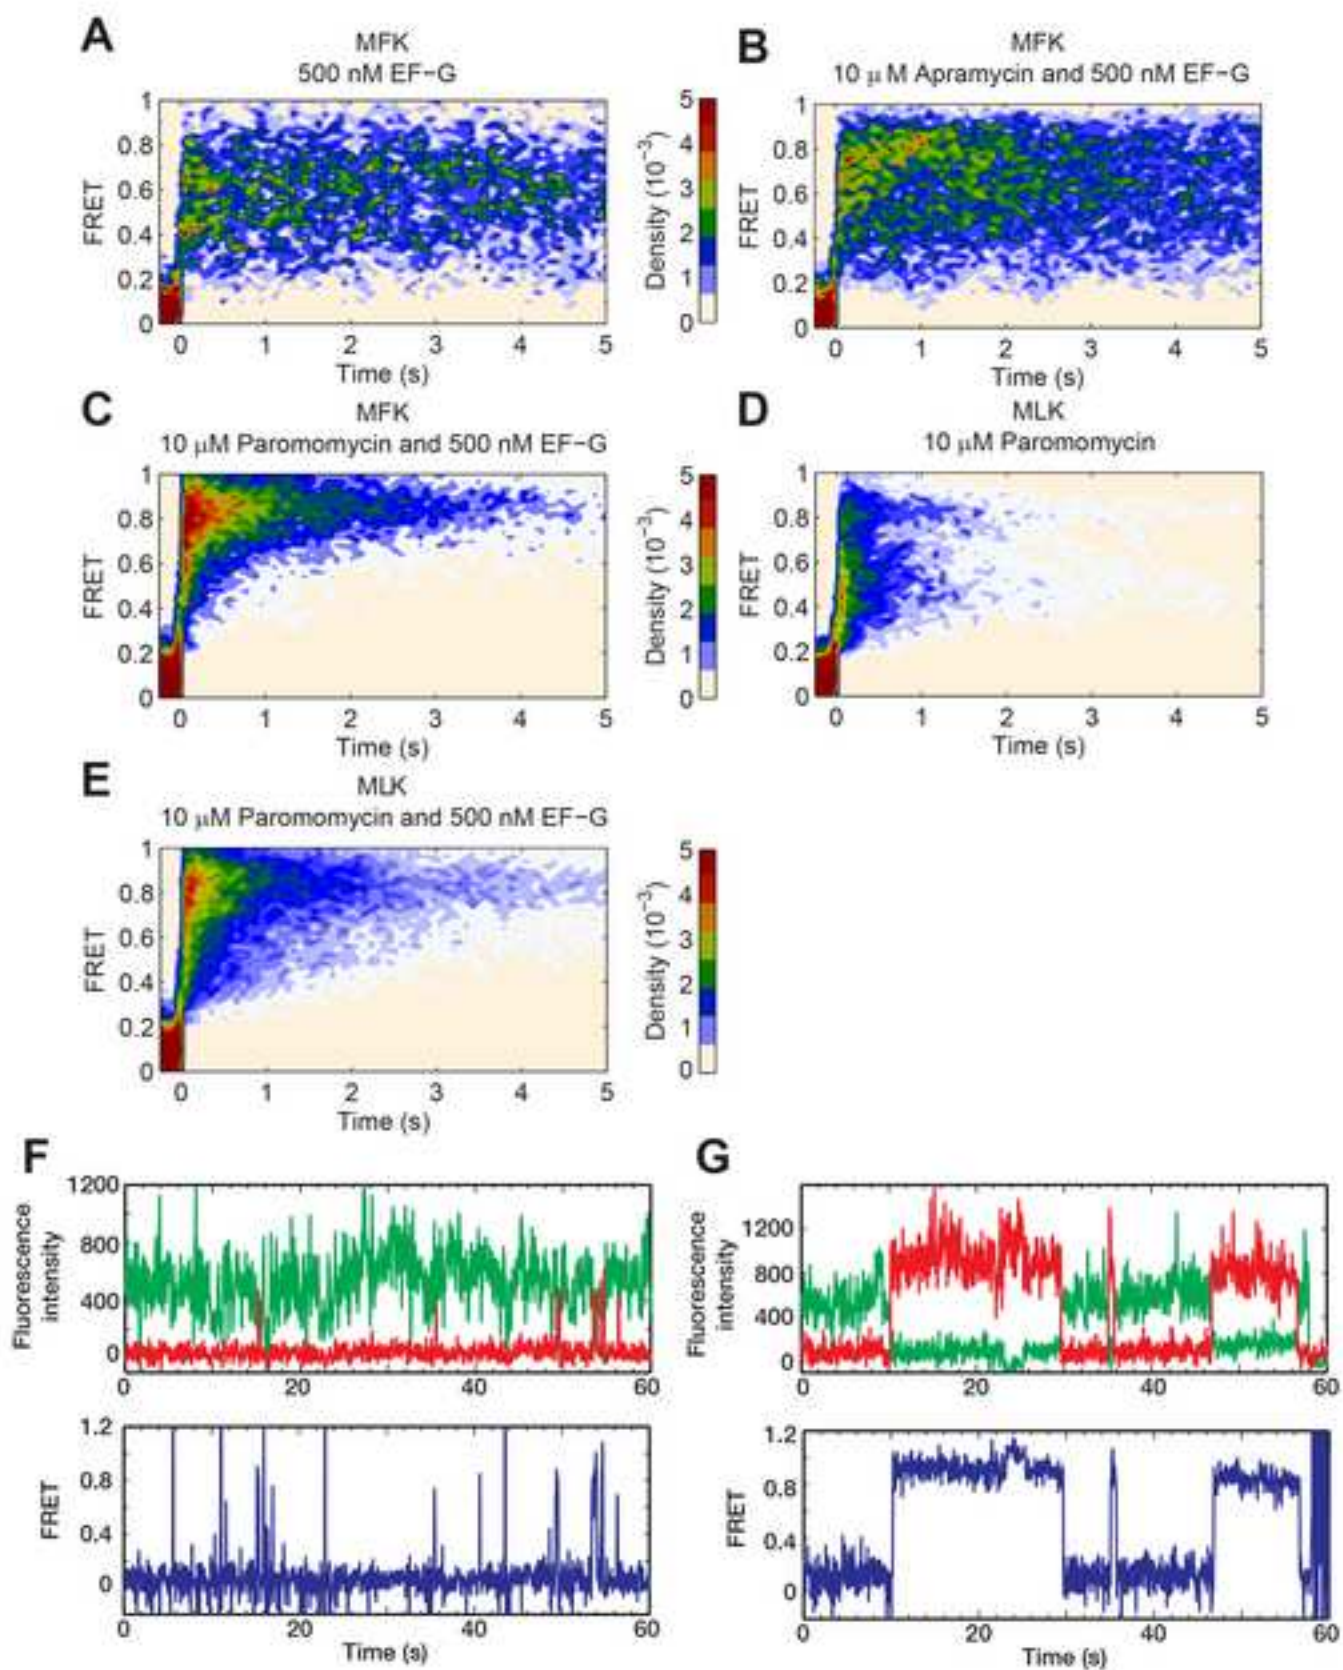

Figure S5

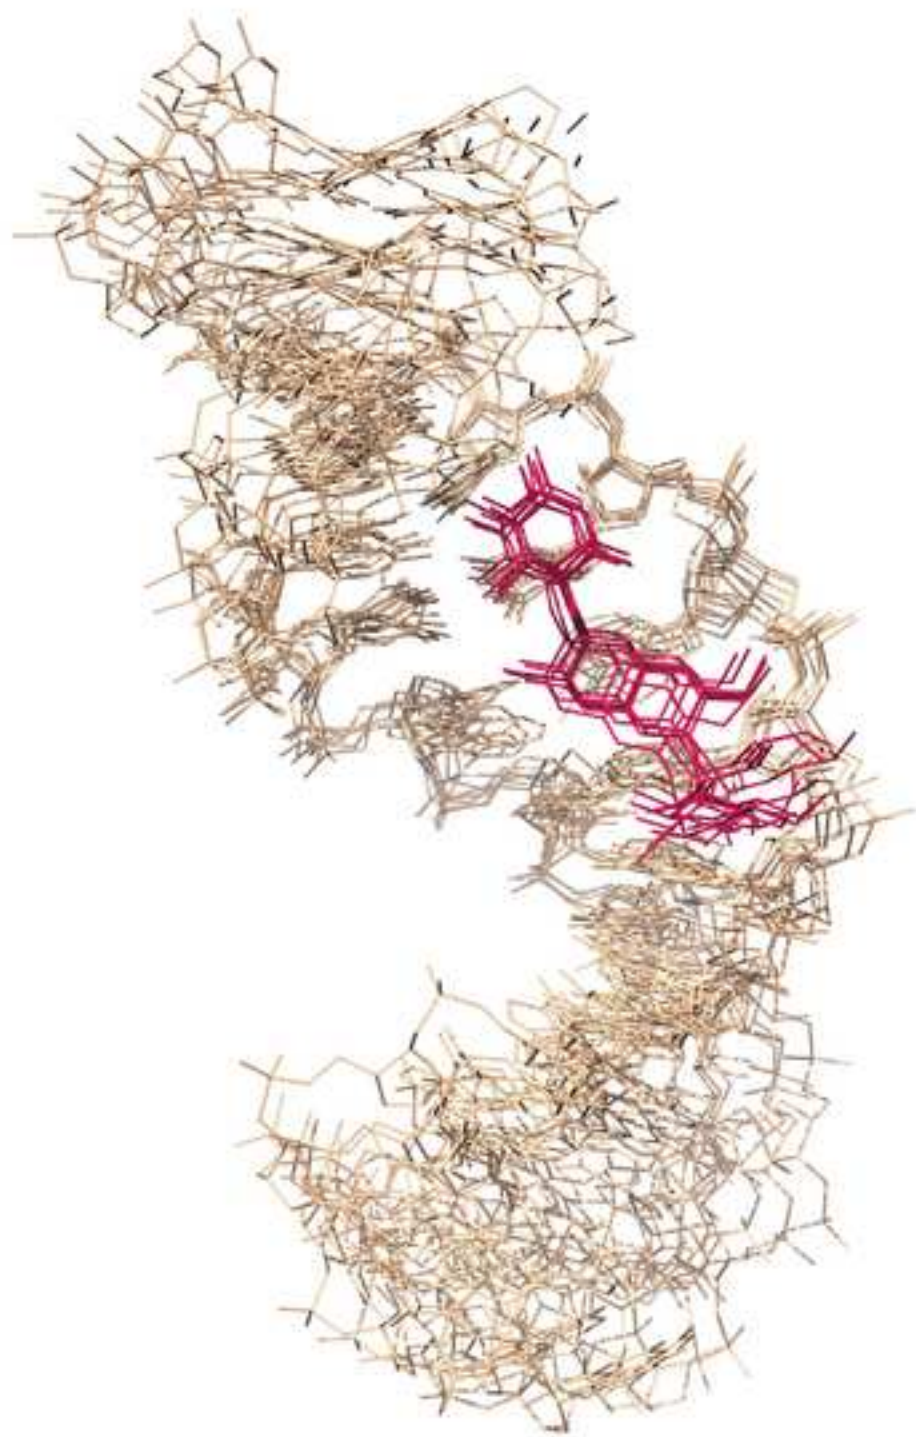

Figure S6

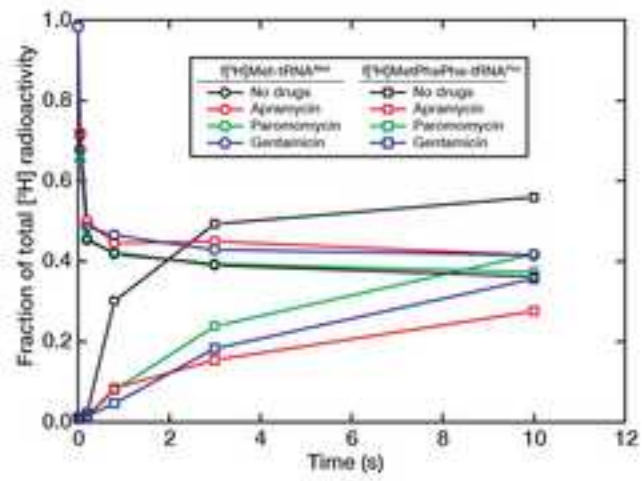

Supplement: NIHMS440810-supplement-02.pdf [file NIHMS440810-supplement-02.pdf]
